# Supplementary material for: Facilitating chlamydia testing among young people: a randomised controlled trial in cyberspace
Source: HighWire-hosted journal article supplement (doi:10.1136/sextrans-2011-050124), 2012-07-04
Supplement: sextrans-2011-050124-s1.pdf [file sextrans-2011-050124-s1.pdf]

Type a term here and press Enter to perform a search.

yuck, I hate blue

**Home**  
[About Chlamydia](#)  
[Trachomatis](#)  
[Chlamydia & You](#)  
[Getting Help](#)  
[Questionnaire](#)

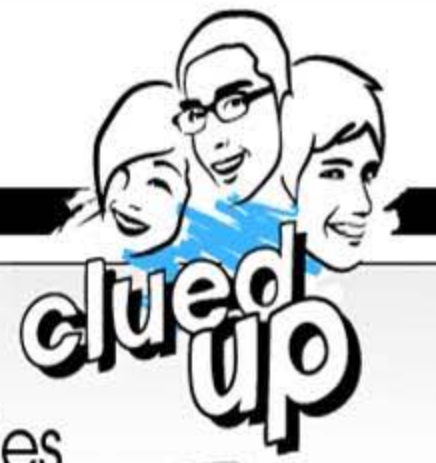

Win an 80G iPod!  
Or one of 9 iPod shuffles  
or 30 CD vouchers

[Simply complete our questionnaire](#)

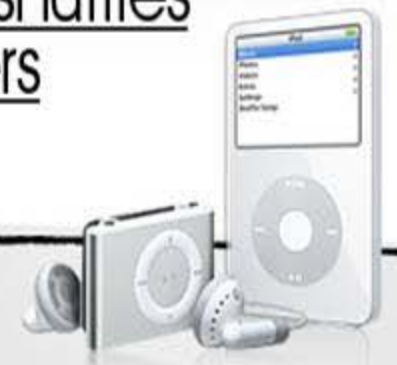

### What is it?

Chlamydia is the most common bacterial sexually transmitted infection in Australia and it's on the rise among young people.

[Find out more](#)

### Answers & Advice

Everything you need to know about Chlamydia, how it could affect you and what can be done about it.

[Find out more](#)

### Take Action

Getting a test for Chlamydia is confidential, and if you have it you can be cured. It's that simple!

[Find out more](#)

**Have your Say**

Have you previously heard of Chlamydia?

yes

no

[Submit](#)

[Visit our Get Clued Up myspace page](#)

Add us as a friend, send us your comments today!
