# Supplementary material for: Facilitating chlamydia testing among young people: a randomised controlled trial in cyberspace
Source: HighWire-hosted journal article supplement (doi:10.1136/sextrans-2011-050124), 2012-07-04
Supplement: sextrans-2011-050124-s3.pdf [file sextrans-2011-050124-s3.pdf]

### Web Appendix 3: Website traffic using Google Analytics

| Month          | Number of unique visitors |
|----------------|---------------------------|
| June 2007      | 2,030                     |
| July 2007      | 2,196                     |
| August 2007    | 3,374                     |
| September 2007 | 3,584                     |
| October 2007   | 3,422                     |
| November 2007  | 3,216                     |
| December 2007  | 2,380                     |
| January 2008   | 2,744                     |
