# Supplementary material for: Facilitating chlamydia testing among young people: a randomised controlled trial in cyberspace
Source: HighWire-hosted journal article supplement (doi:10.1136/sextrans-2011-050124), 2012-07-04
Supplement: sextrans-2011-050124-s4.pdf [file sextrans-2011-050124-s4.pdf]

## Web Appendix 4: Knowledge statements and attitude questions

---

### Knowledge question

---

*Chlamydia is a sexually transmissible infection that affects only women*

*Chlamydia can lead to sterility among women*

*A woman can have chlamydia without any obvious symptoms*

*A man can have chlamydia without any obvious symptoms*

*Chlamydia is curable*

*Chlamydia can be prevented by using condoms when you have sex*

*Chlamydia can be tested for with a urine sample*

---

---

### Attitude

---

*I think I am at risk for chlamydia*

*I don't think I have chlamydia*

*I don't care whether I have chlamydia or not*

*I don't know how to get a chlamydia test*

*I would be too embarrassed to see a doctor or nurse to talk about chlamydia*

*I would not see a doctor or nurse about chlamydia because I am worried about confidentiality*

*It is difficult for me to see a doctor or nurse about chlamydia because of transport*

*I would prefer to see a doctor or nurse who is the same sex as me for a chlamydia test*

*It is difficult for me to see a doctor or nurse about chlamydia because of cost*

*I would feel comfortable visiting a doctor or nurse to get a chlamydia test*

*I do not want to talk to a doctor or nurse about my sexual history*

*I can't get a chlamydia test because I don't have a Medicare card*

*I don't want a chlamydia test because I'm scared of what it might show*

*I don't want a chlamydia test because my partner/s might find out*

*I would have a chlamydia test if my partner/s wanted me to*

*I would have a chlamydia test if my doctor recommended it*

*I want to have a chlamydia test because I would want to prevent any long term health problems from Chlamydia*

*I want to have a chlamydia test because I don't want to give chlamydia to my partner/s if I have it*

---
